# Supplementary material for: Applicability of Yeast Fermentation to Reduce Fructans and Other FODMAPs
Source: PubMed Central journal article supplement (PMC6163668; doi:10.3390/nu10091247), 2018-09-06
Supplement: nutrients-10-01247-s001.pdf [file nutrients-10-01247-s001.pdf]

## Supplementary Materials:

**Table S1:** Utilized yeast species, source of isolation, and determination of identification by MALDI-TOF MS and % similarity with the accession number of the closest relative by blastn received by 16S rDNA sequencing

| Yeast species                   | Isolation source         | MALDI-TOF MS score | % similarity (accession no. of the closest relative by blastn) |
|---------------------------------|--------------------------|--------------------|----------------------------------------------------------------|
| <i>Hanseniaspora uvarum</i>     | wheat sourdough, Austria | 2.30               | n.a. <sup>1</sup>                                              |
| <i>Saccharomyces cerevisiae</i> | baker's yeast            | 2.03               | n.a. <sup>1</sup>                                              |
| <i>Saccharomyces cerevisiae</i> | rye sourdough, Austria   | 2.13               | 99 (KX428529.1)                                                |
| <i>Torulaspota delbrueckii</i>  | wheat sourdough, Austria | 1.65*              | 99 (MH010872.1)                                                |

<sup>1</sup> n.a.: not analyzed; \*score less than 2.0 indicates ambiguous identification;

**Table S2:** Determination of log CFU g<sup>-1</sup> of 13 different yeast strains on YG-agar (Merck, Darmstadt, Germany), with incubation conditions of 25 °C for 48 h.

| Species                         | Strain                       | log cfu/mL |
|---------------------------------|------------------------------|------------|
| <i>Candida glabrata</i>         | BCCM/MUCL <sup>1</sup> 51245 | 7.9        |
| <i>Candida humilis</i>          | BCCM/MUCL <sup>1</sup> 30041 | 6.9        |
| <i>Kazachstania exigua</i>      | BCCM/MUCL <sup>1</sup> 52365 | 7.3        |
| <i>Kluyveromyces marxianus</i>  | BCCM/MUCL <sup>1</sup> 30016 | 7.1        |
| <i>Pichia kudriavzevii</i>      | BCCM/MUCL <sup>1</sup> 29043 | 7.2        |
| <i>Torulaspota delbrueckii</i>  | BCCM/MUCL <sup>1</sup> 51211 | 7.8        |
| <i>Torulaspota pretoriensis</i> | BCCM/MUCL <sup>1</sup> 27827 | 7.6        |
| <i>Wickerhamomyces anomalus</i> | DSM <sup>2</sup> 6766        | 7.2        |
| <i>Hanseniaspora uvarum</i>     | sourdough isolate            | 7.1        |
| <i>Saccharomyces cerevisiae</i> | sourdough isolate            | 7.6        |
| <i>Saccharomyces cerevisiae</i> | baker's yeast                | 7.3        |
| <i>Torulaspota delbrueckii</i>  | sourdough isolate            | 7.7        |

<sup>1</sup> BCCM/MUCL: Belgian Coordinated Collection of Microorganisms/Agro-food & Environmental Fungal Collection. <sup>2</sup>DSMZ: Leibniz-Institute DSMZ-German Collection of Microorganisms and Cell Cultures.

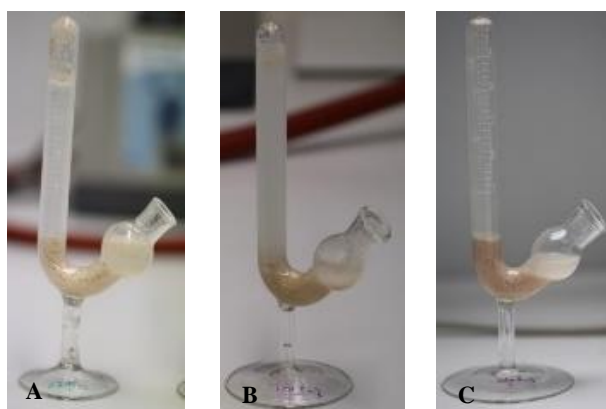

**Figure S1:** Determination of the gas building capacity of (A) *Saccharomyces cerevisiae*, (B) *Torulaspota delbrueckii* MUCL 51211 and (C) *Kluyveromyces marxianus* MUCL 30016 by fermentation locks according to Einhorn.

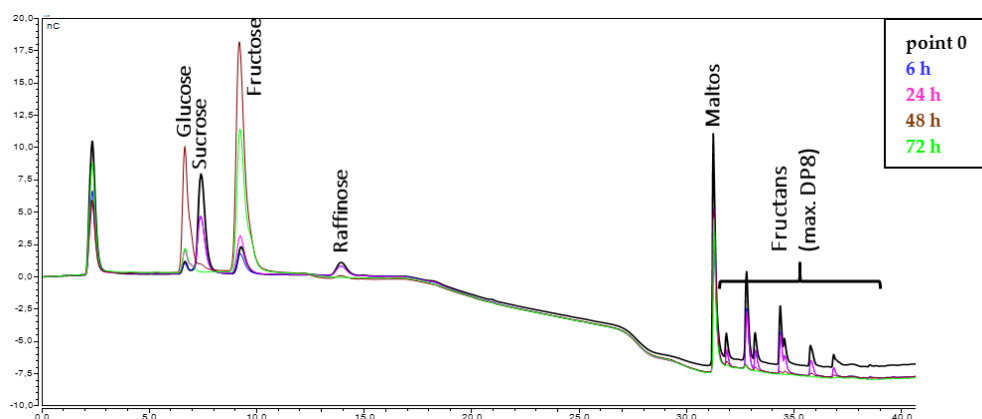

**Figure S2:** HPAEC-PAD analysis with CarboPac PAD 210 250x2 mm and eluent A (100 mM NaOH) and B (100 mM NaOH/500 mM NaAcetate) to determine glucose, sucrose, fructose, raffinose, maltose, and fructans (max. DP 8) metabolism by *Kluyveromyces marxianus* MUCL 30016 at point 0, after 6 h, 24 h, 48 h, and 72 h of fermentation.

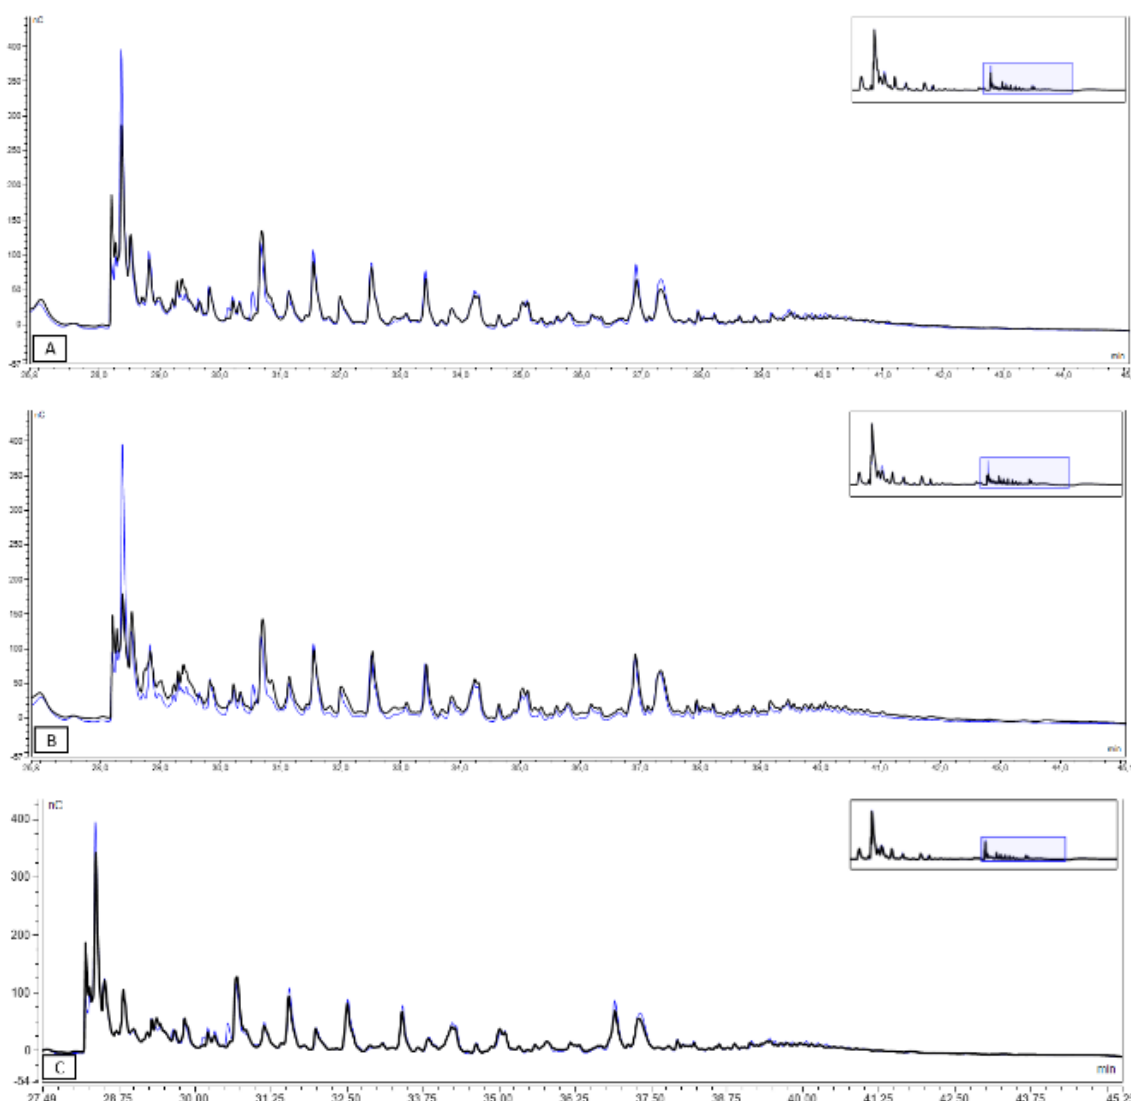

**Figure S3:** HPAEC-PAD analysis of (A) *Candida humilis* MUCL 30041 and (B) *Candida glabrata* MUCL 51245, and (C) *Pichia kudriavzevii* MUCL 29043 showing the initial fructan presence (black line) and after 8 h 15 min of fermentation at 25 °C (blue line), with a low conversion rate of fructan.

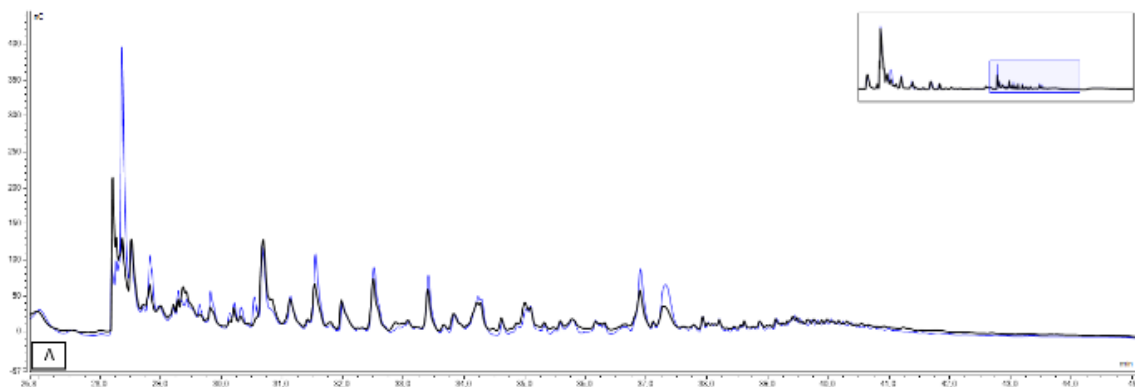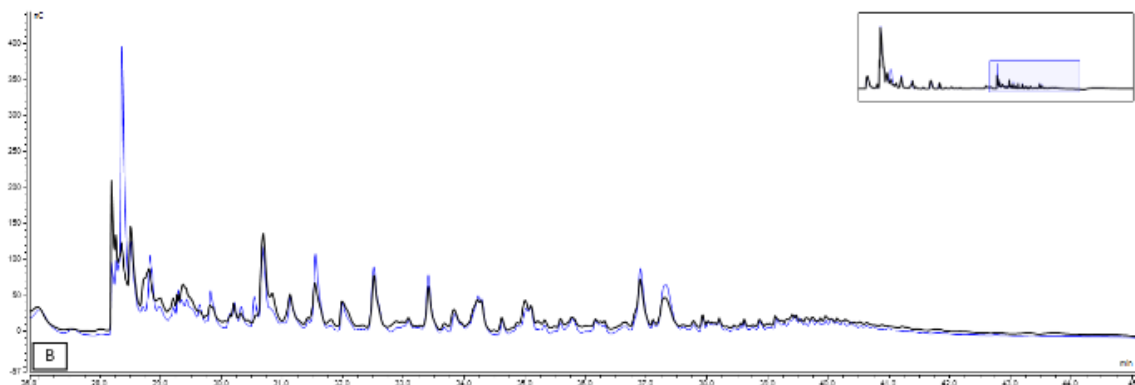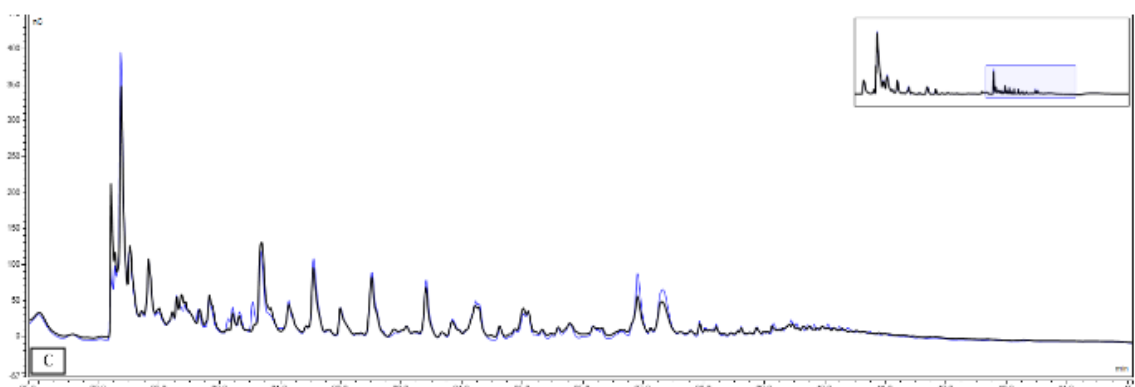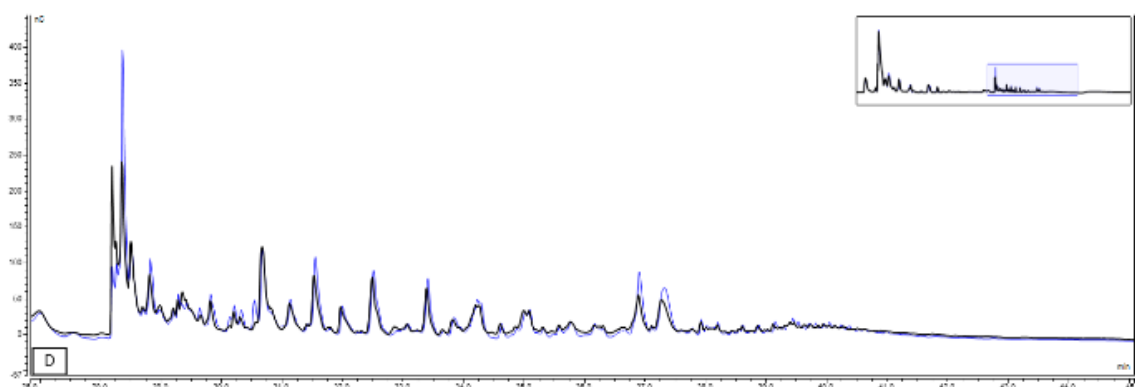

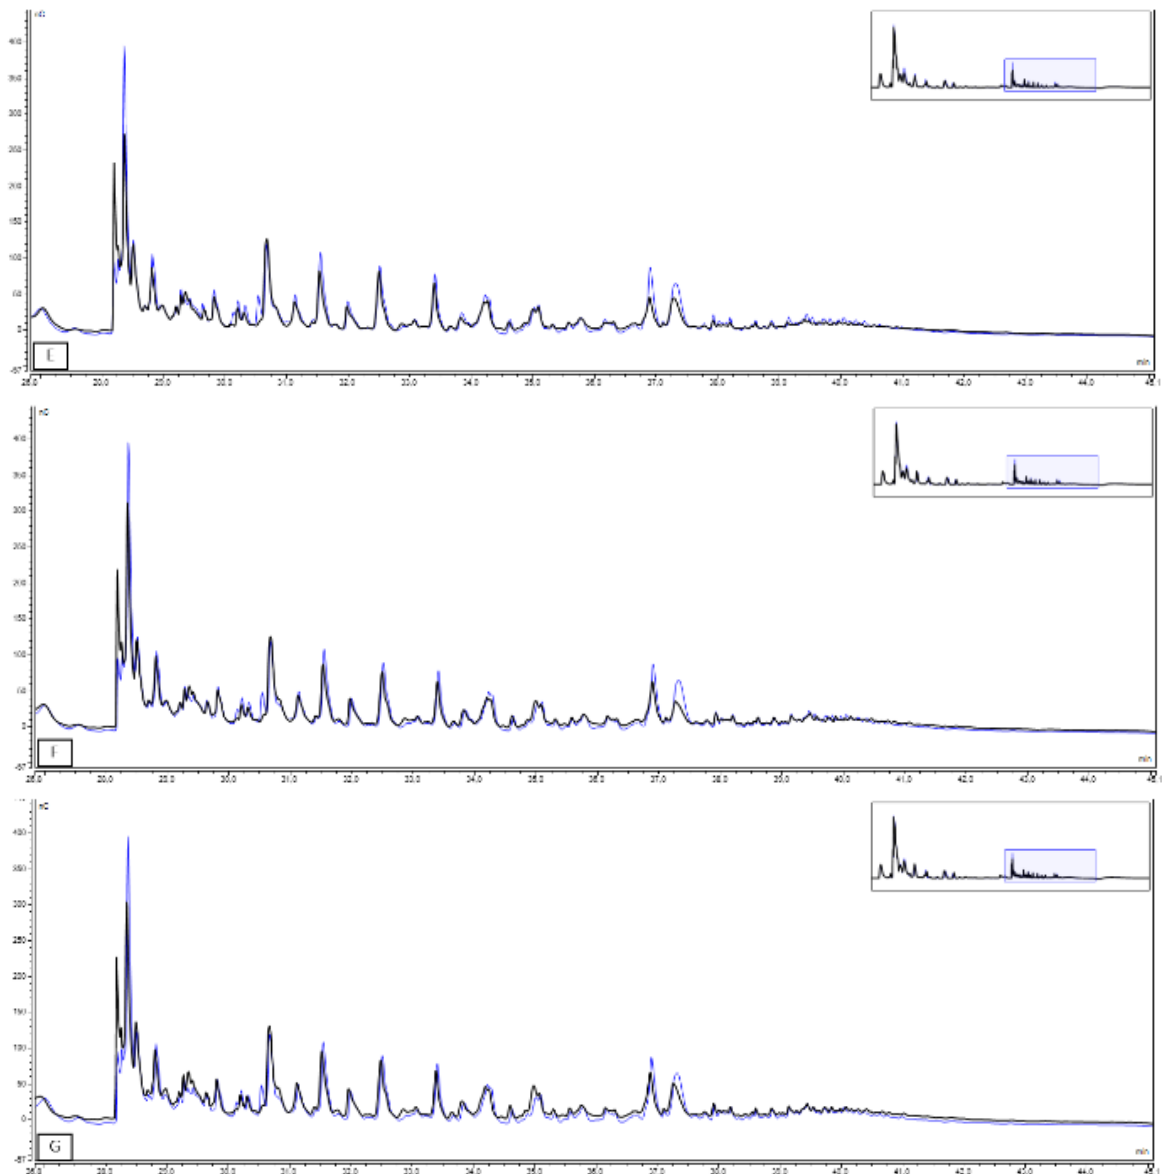

**Figure S4:** HPAEC-PAD fructan fingerprint analysis of (A) *Torulaspora delbrueckii* MUCL 51211, (B) *Saccharomyces cerevisiae*–baker’s yeast, (C) *Kluyveromyces marxianus* MUCL 30016, (D) *Wickerhamomyces anomalus* DSM 6766, (E) *Torulaspora pretoriensis* MUCL 27827, (F) *Candida lambica*–sourdough isolate, and (G) *Hanseniaspora uvarum*–sourdough isolate showing the initial fructan presence (blue line) and after 8 h 15 min of fermentation (black line) at 25 °C, with moderate degradation of fructans.

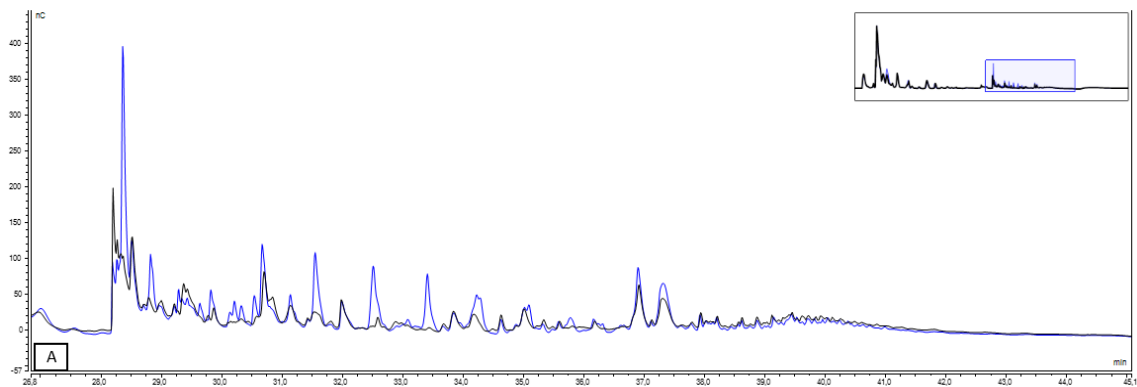

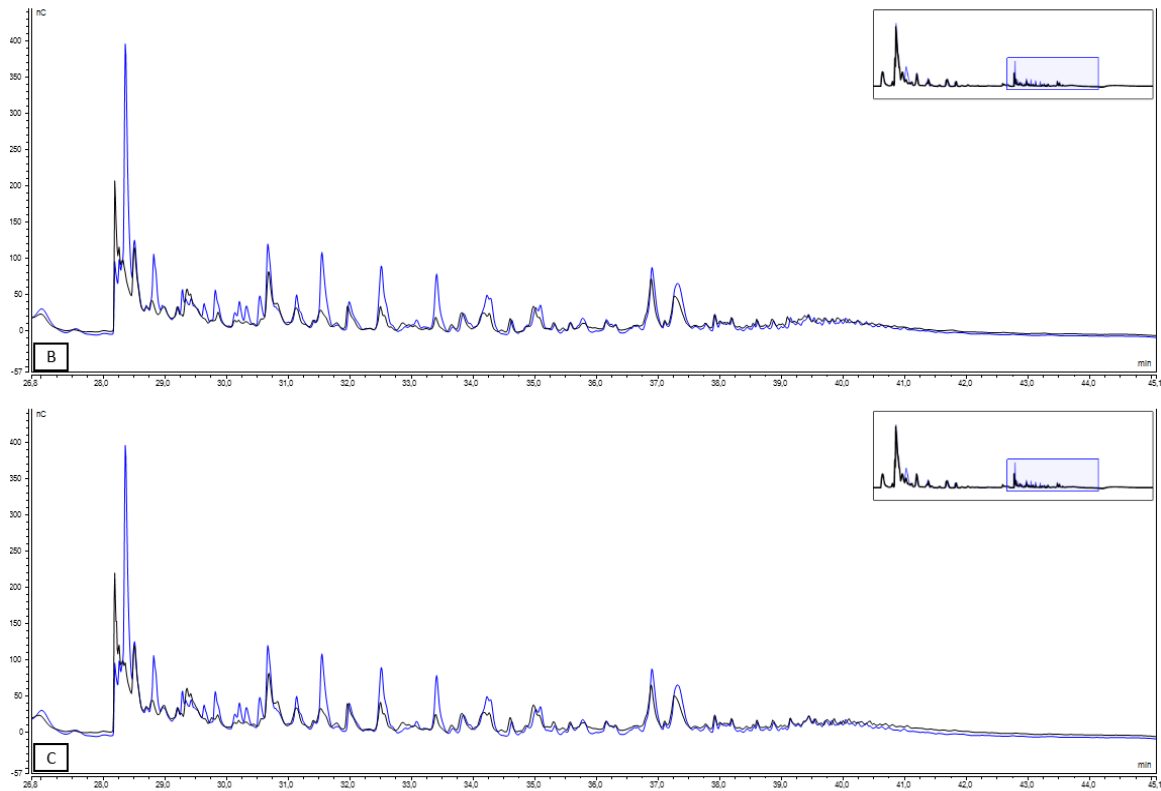

**Figure S5:** HPAEC-PAD analysis of (A) *Kazachstania exigua* MUCL 52365, (B) *Saccharomyces cerevisiae*-sourdough isolate, and (C) *Torulaspota delbrueckii*-sourdough isolate, showing the initial fructan presence (blue line) and after 8 h 15 min of fermentation (black line) at 25 °C, with the highest degradation of fructans.
